# Supplementary material for: Preparation of nickel foam modified by multiwalled hollow spheres of NiCo 2 O 4 as a promising non-enzymatic glucose sensor
Source: Royal Society of Chemistry journal article supplement (doi:10.1039/d3ra08663a), 2024-01-01

## Electronic supporting information (ESI)

ESI:S1. Cyclic voltammogram of glucose determination in blood plasma in 1.0 M NaOH at NiCo<sub>2</sub>O<sub>4</sub>@Ni Foam

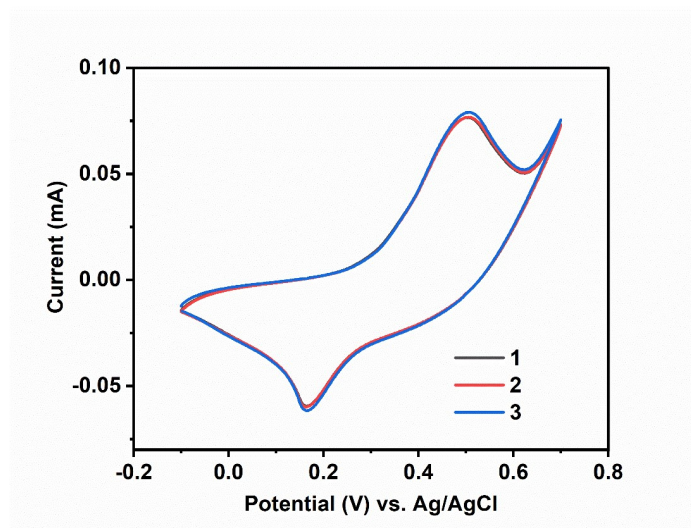

ESI:S2. Glucose content calculation in blood plasma using CV measurement

Oxidation peak current at glucose detection using CV technique

| Measurement | Current (mA) |
|-------------|--------------|
| 1           | 0.0665       |
| 2           | 0.0664       |
| 3           | 0.0664       |
| Average     | 0.0664       |

$$y = 0.0173x - 0.0002$$

$$0.0664 = 0.0173[\text{glucose}] - 0.0002$$

$$[\text{glucose}] = 3.8 \mu\text{M}$$

$$\text{Initial concentrations} = [\text{glucose}] \times \text{diluting factor} = 9.53 \text{ mM}$$

$$\text{mM conversion to mg/dL} = 9.53 / 0.0555$$

$$= 173.28 \text{ mg/dL}$$

ESI:S3. Glucose determination using gluco detector

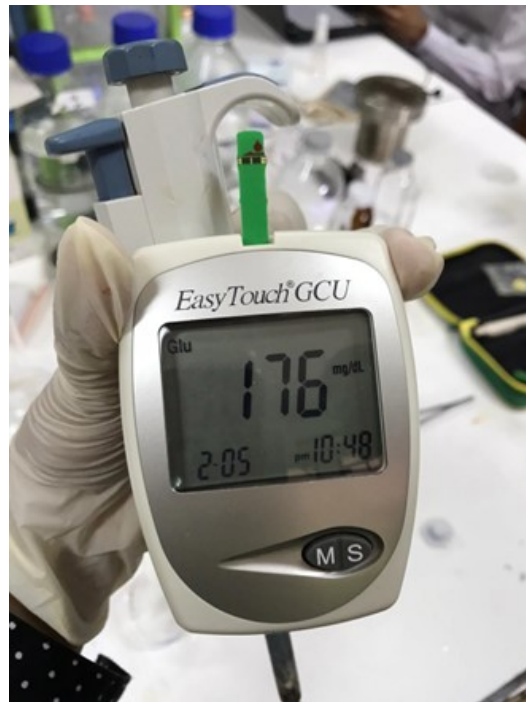

Supplement: d3ra08663a1.pdf [file d3ra08663a1.pdf]
